# Supplementary material
Source: PubMed Central journal article supplement (PMC2867863)
Supplement: 0910259107_pnas.0910259107_SI.pdf [file 0910259107_pnas.0910259107_SI.pdf]

# Supporting Information

Barthélemy et al. 10.1073/pnas.0910259107

SI Text

SI Model and Method

## 1 Determining the $A_i$ s by Using Eigenvectors of the Correlation Matrix.

The data correlation matrix  $C_{ij}$  is known to provide useful information, in particular for the analysis of financial time series (1–3) or in other fields; e.g., in protein structure analysis (4). The first, largest, eigenvalue is related to a global trend, and usually one is interested in the small number of intermediate eigenvalues: The associated eigenvectors give the relevant correlations in the data—e.g., allows to extract the sectors in financial time series. Here, making explicit use of our hypotheses, we extract from the first eigenvector of the correlation matrix the  $A_i$  factors that show how the global trend is amplified or reduced at the local level.

We have

$$C_{ij} = A_i A_j + D_{ij} \quad [S1]$$

where  $D_{ij} = \langle G_i G_j \rangle$ . If  $\psi$  is a normalized eigenvector ( $\psi \cdot \psi = 1$ ) of  $C$  with eigenvalue  $\lambda$ :  $C \cdot \psi = \lambda \psi$ , we have

$$C \cdot \psi = (A \cdot \psi)A + D \cdot \psi. \quad [S2]$$

We can have  $A \cdot \psi$  equal to zero, which implies that  $\psi$  is also eigenvector for  $D$ , which in general is unlikely (there are no reasons that eigenvectors of  $D$  are orthogonal to  $A$ ). If  $A \cdot \psi \neq 0$  we then obtain

$$\lambda = A \cdot A + \frac{A \cdot D \cdot \psi}{A \cdot \psi} \quad [S3]$$

and

$$\psi = \frac{A \cdot \psi}{\lambda} A + \frac{D \cdot \psi}{\lambda}. \quad [S4]$$

For the largest eigenvalue, we will neglect at first order the second term of the right-hand side of this last equation, which leads to  $\psi \propto A$ . Because  $\psi$  is normalized, we obtain

$$\psi \approx \frac{A}{\sqrt{A \cdot A}}. \quad [S5]$$

This approximation is justified if  $A \cdot D \cdot \psi$  is small compared to  $A \cdot A$  and thus

$$\frac{A \cdot D \cdot A}{(A^2)^2} \ll 1. \quad [S6]$$

Because  $A \cdot A = \mathcal{O}(N)$ , this approximation is justified if  $A \cdot D \cdot A$  is of order  $N$  and not of order  $N^2$ . This is correct if  $D$  is diagonal (which means that the external components are not correlated  $\langle G_i G_j \rangle \propto \delta_{ij}$ ), but also if the number of nonzero terms of  $D_{ij}$  is finite compared to  $N$ , or in other words if  $D$  is a sparse matrix.

We compared the values of  $A_i$  computed with the method exposed in the text and with the eigenvector method. Results are reported in the Figs. S1, S2, and S3.

We see that indeed for the crime rates in the United States and in France,  $D_{ij}$  is indeed negligible, which demonstrate that the correlations of the internal contributions between different states in the United States are negligible. This is not the case for the stocks in the Standard and Poor's 500 Index (S&P 500) where we can observe (small) discrepancies between the two methods, a result which supports the idea of sectors in the S&P 500.

**2 Scaling.** We show that the scaling  $\sigma_i^{\text{ext}} \sim \langle f_i \rangle$  observed by de Menezes and Barabasi in (5, 6) is actually built in the method proposed by these authors: it is a direct consequence of their definitions of the internal and external parts, and it does not depend on the data structure.

Indeed, let  $f_j(t), t = 1, \dots, T, i = 1, \dots, N$  be an arbitrary dataset such that  $\langle f \rangle \neq 0$ . For  $i = 1, \dots, N$ , following (5) define  $A_i^{\text{MB}}$  by

$$A_i^{\text{MB}} \equiv \frac{\langle f_i \rangle}{\langle f \rangle} \quad [S7]$$

and  $f_i^{\text{MB,ext}}(t)$  by

$$f_i^{\text{MB,ext}}(t) \equiv A_i^{\text{MB}} \bar{f}(t). \quad [S8]$$

Then, from these definitions and without any hypothesis or constraint on the data other than  $\langle f \rangle \neq 0$ , one has

$$\langle f_i^{\text{MB,ext}} \rangle = A_i^{\text{MB}} \langle \bar{f}(t) \rangle = \langle f_i \rangle \quad [S9]$$

and

$$\langle (f_i^{\text{MB,ext}})^2 \rangle = (A_i^{\text{MB}})^2 \langle \bar{f}(t)^2 \rangle. \quad [S10]$$

Hence

$$(\sigma_i^{\text{MB,ext}})^2 = (A_i^{\text{MB}})^2 \sigma_{\bar{f}}^2 = \langle f_i \rangle^2 \frac{\sigma_{\bar{f}}^2}{\langle \bar{f} \rangle^2} \quad [S11]$$

with

$$\sigma_{\bar{f}}^2 \equiv \langle \bar{f}(t)^2 \rangle - \langle \bar{f}(t) \rangle^2. \quad [S12]$$

Hence, one has always

$$\sigma_i^{\text{MB,ext}} = \frac{\sigma_{\bar{f}}}{|\langle \bar{f} \rangle|} |\langle f_i \rangle|. \quad [S13]$$

The dispersion of the external component, if defined from [S7] and [S8], is thus exactly proportional to the mean value of the local data.

**3 Synthetic Series: Correlated Random Walkers.** We considered the case where the external trend is

$$F(t) = \sin(\omega t). \quad [S14]$$

The Gaussian noises are given by

$$\xi_i(t) = \alpha \sum_{j=1}^M u_j^{(0)}(t) + \sum_{j=M+1}^N u_j^{(i)}(t) \quad [S15]$$

where the  $u_j^{(0)}(t)$  and  $u_j^{(i)}(t)$  are independent, uniform random variable of zero mean and variance equal to  $1/12$ . In this case, the correlation between different noises are governed by the parameters  $\alpha$  and  $M$

$$\overline{\xi_i \xi_j} = \frac{\alpha^2 M}{12} + \frac{N - M}{12} \delta_{ij}. \quad [S16]$$

When  $M = 0$ , the variables  $\xi_i$  and  $\xi_j$  are independent (for  $i \neq j$ ) and we can monitor the correlations by increasing the value of  $M$ . We plot  $N = 100$  random walkers in the usual uncorrelated case in Fig. S4 and in presence of correlations in Fig. S5.
